# Supplementary material
Source: Research Square preprint supplement (doi:10.21203/rs.3.rs-9287908/v1)

**Graphical abstract**

**Facile synthesis of dual-emission carbon dots embedded in a Poly(vinyl alcohol)/Alginate film for selective discrimination of NO2- and Fe3+ and smartphone-assisted water monitoring**


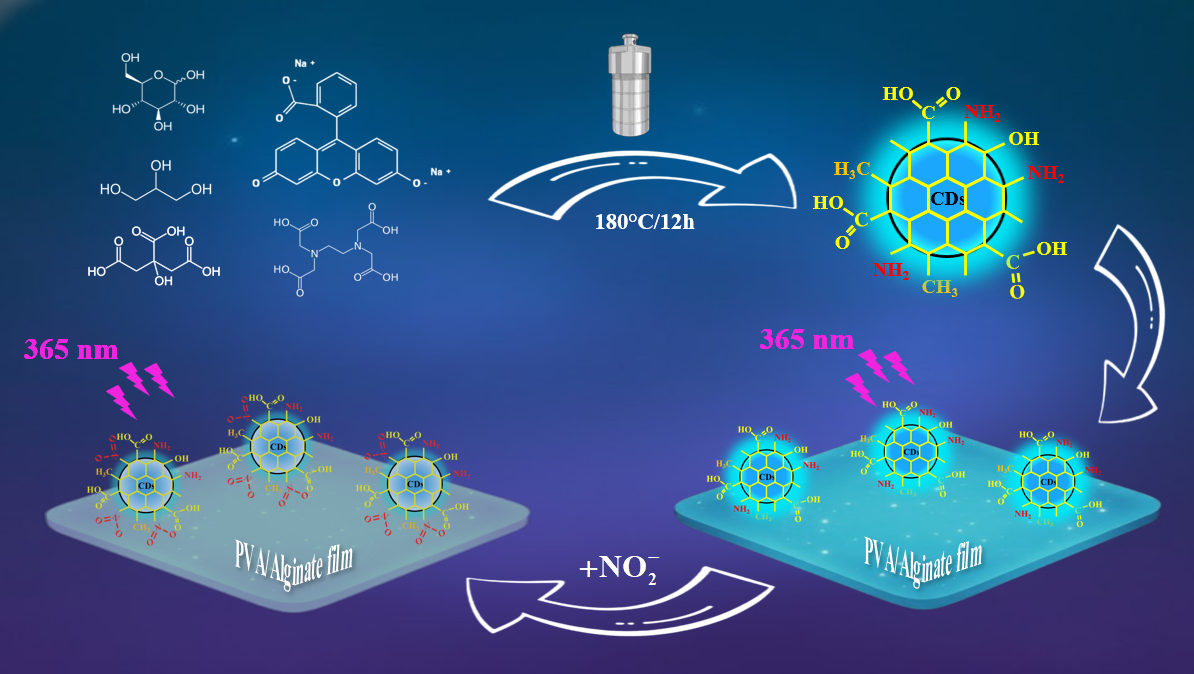

Supplement: Supplementary file 1 [file b841e4d854c46600d8308694.docx]
